# Supplementary material
Source: Research Square preprint supplement (doi:10.21203/rs.3.rs-8816203/v1)
Supplement: Supplementary file 1 [file a4b4785a927562e863f161e8.docx]

Supplementary table 1

The oligonucleotides used in this study.

| **Oligonucleotides** | **Sequence (5’-3’)** |
| --- | --- |
| si-NC sense | UUCUCCGAACGUGUCACGUTT |
| si-NC antisense | ACGUGACACGUUCGGAGAATT |
| si-ZRANB1-1 sense | GGUAGAGAUUGGGAUCCUUTT |
| si-ZRANB1-1 antisense | AAGGAUCCCAAUCUCUACCTT |
| si-ZRANB1-2 sense | GCAGGAUAUGCUAGCAAUATT |
| si-ZRANB1-2 antisense | UAUUGCUAGCAUAUCCUGCTT |
| si-SF3B3-1 sense | GCUAGACCUUGGUUUAAAUTT |
| si-SF3B3-1 antisense | AUUUAAACCAAGGUCUAGCTT |
| si-SF3B3-2 sense | CAGCCAUCUAAGAAUAUGUTT |
| si-SF3B3-2 antisense | ACAUAUUCUUAGAUGGCUGTT |
